# Supplementary material for: Apis mellifera propolis enhances apoptosis and invasion inhibition in head and neck cancer cells
Source: PeerJ journal article supplement (doi:10.7717/peerj.12139), 2021-09-08

# Generic Display Report (all)

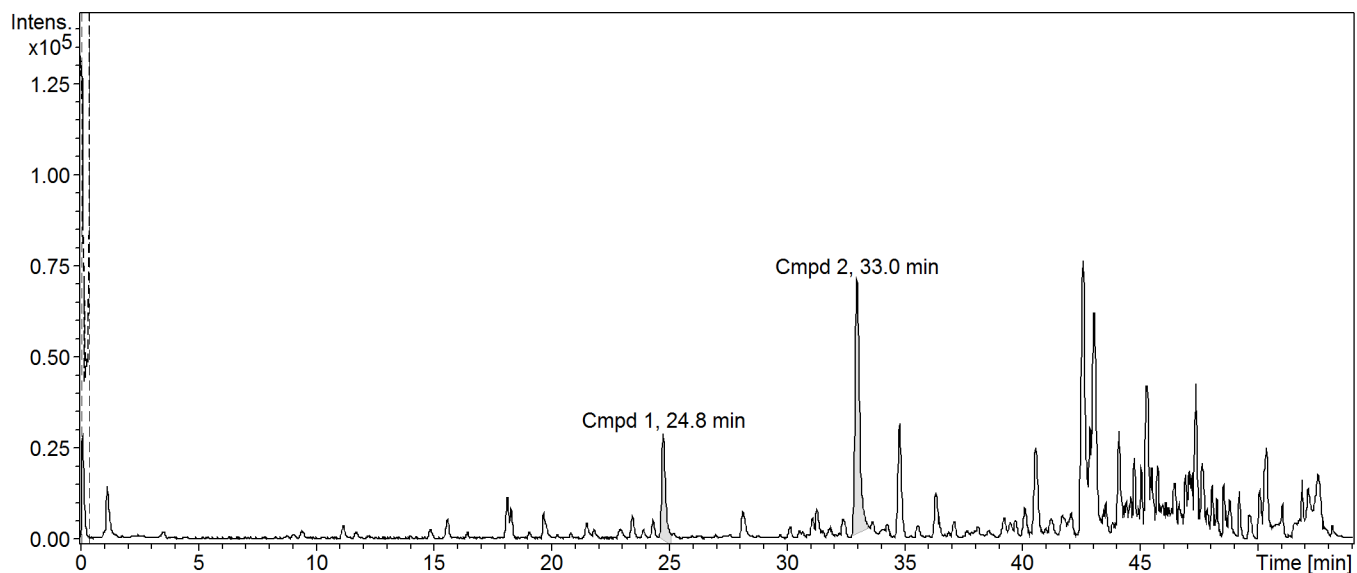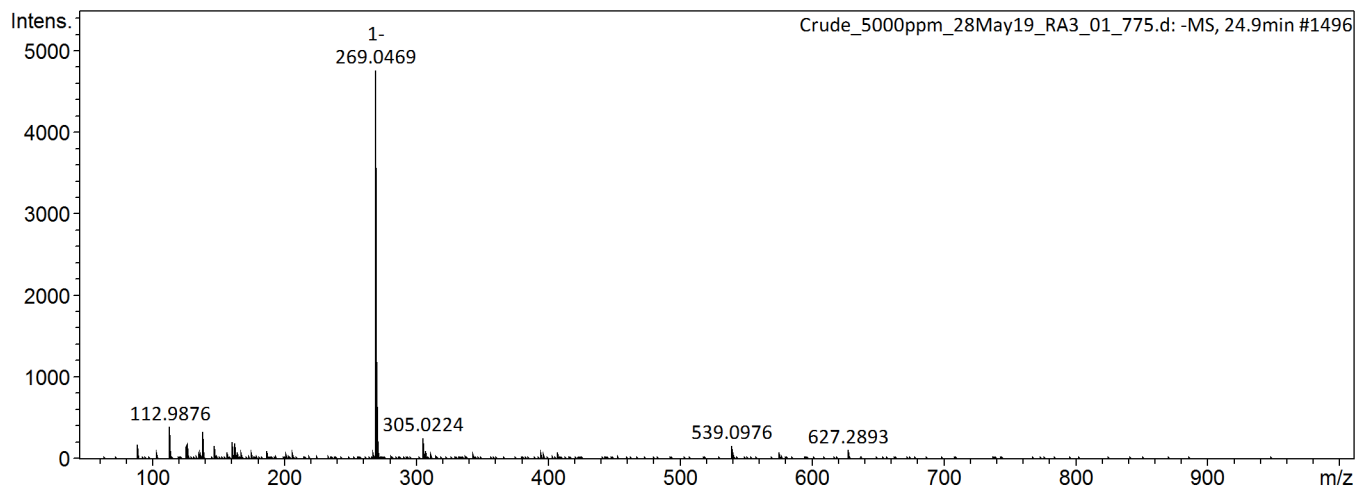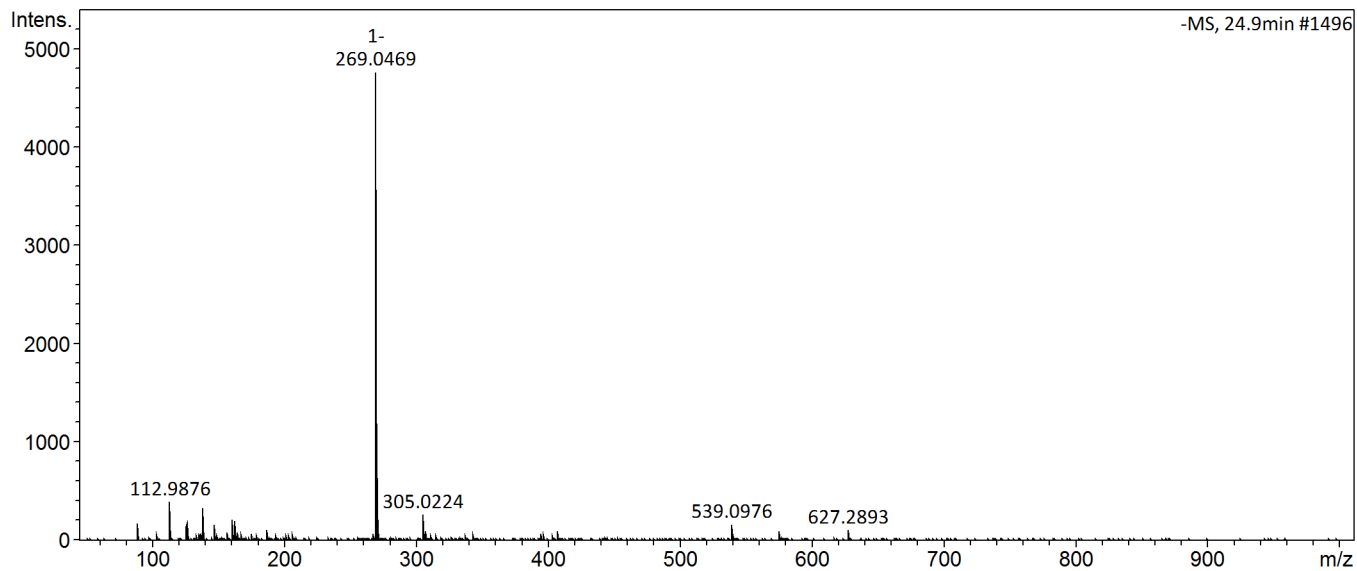

Supplement: EAEP.pdf [file EAEP.pdf]
