# Supplementary material for: Apis mellifera propolis enhances apoptosis and invasion inhibition in head and neck cancer cells
Source: PeerJ journal article supplement (doi:10.7717/peerj.12139), 2021-09-08

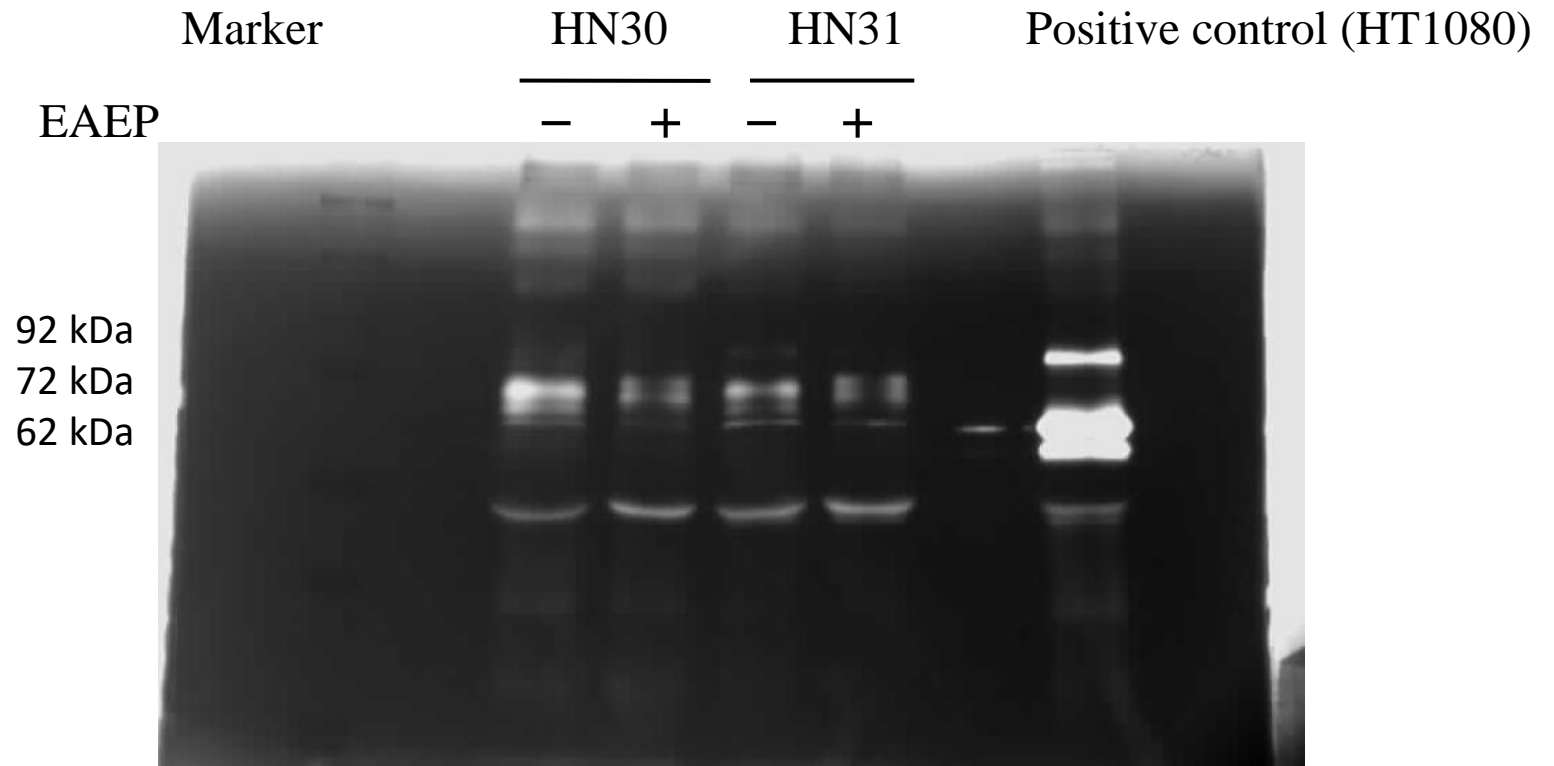

| Marker | HN4 |   | HN12 |   | Positive control (HT1080) |
|--------|-----|---|------|---|---------------------------|
| EAEP   | -   | + | -    | + |                           |

92 kDa  
72 kDa  
62 kDa

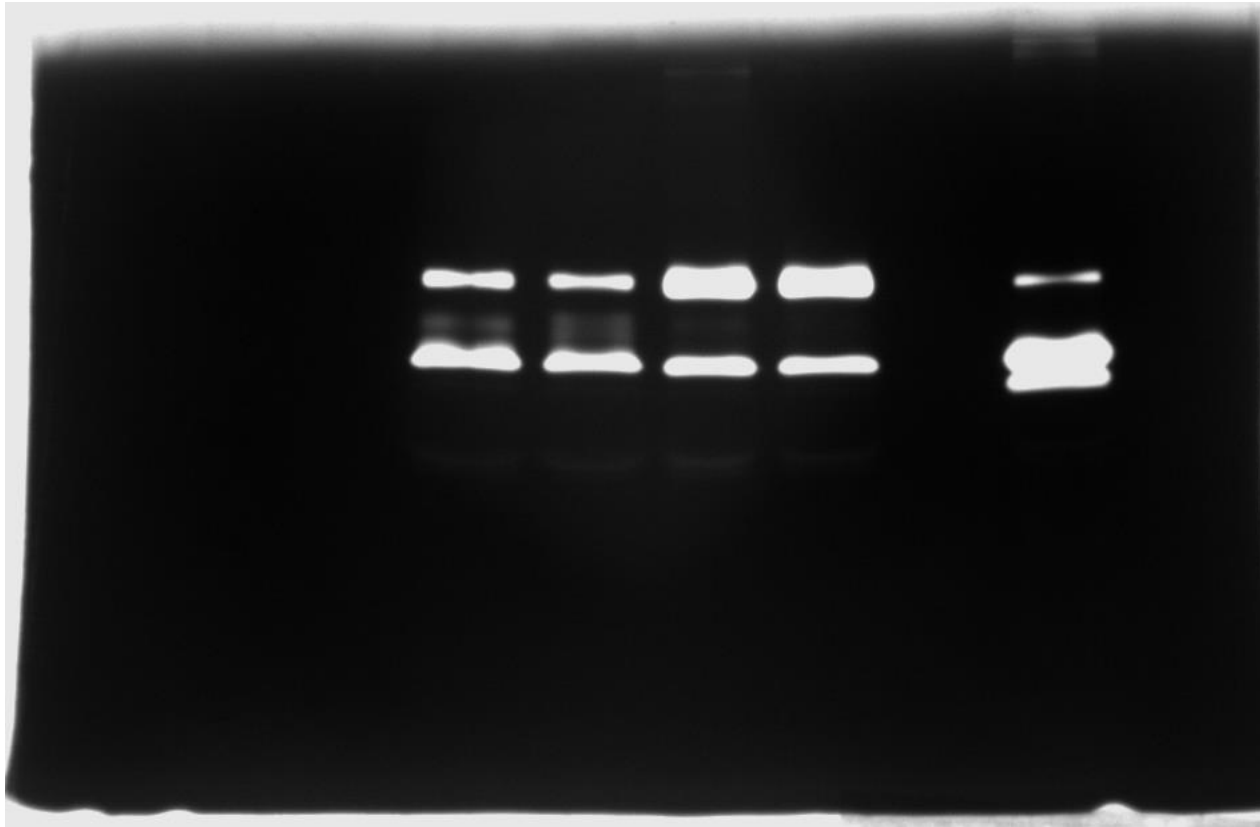

Supplement: Uncropped_gel-MMPs.pdf [file Uncropped_gel-MMPs.pdf]
